# 1 **Micro-scale ecology regulates particulate organic matter turnover in model marine** 2 **microbial communities**

3  
4 Tim N. Enke<sup>1,2</sup>, Gabriel E. Leventhal<sup>1</sup>, Matthew Metzger<sup>1</sup>, José T. Saavedra<sup>1</sup> and Otto X.  
5 Cordero<sup>1</sup>

6 <sup>1</sup> Department of Civil and Environmental Engineering, Massachusetts Institute of Technology

7 <sup>2</sup> Department of Environmental Systems Science, ETH Zurich

## 8 **Abstract**

9 The degradation of particulate organic matter in the ocean is a central process in the global  
10 carbon cycle, the ‘mode and tempo’ of which is determined by the bacterial communities that  
11 assemble on particle surfaces. Although recent studies have shed light on the dynamics of  
12 community assembly on particles –which serve as hotspots of microbial activity in the ocean,  
13 the mapping from community composition to function, i.e. particle degradation, remains  
14 completely unexplored. Using a collection of marine bacteria cultured from different stages of  
15 succession on chitin micro-particles we found that the hydrolytic power of communities is  
16 highly dependent on community composition. Different particle degrading taxa –all of which  
17 were early successional species during colonization– displayed characteristic particle half-  
18 lives that differed by ~170 hours, comparable to the residence time of particles in the ocean’s  
19 mixed layer<sup>1</sup>. These half-lives were in general longer in multispecies communities, where the  
20 growth of obligate cross-feeders limited the ability of degraders to colonize and consume  
21 particles. Remarkably, above a certain critical initial ratio of cross-feeder to degrader cells,  
22 particle degradation was completely blocked along with the growth of all members of the  
23 community. We showed that this interaction occurred between a variety of strains of different  
24 taxonomic origins and that it only appears when bacteria interact with particles, suggesting a  
25 mechanism by which non-degrading secondary consumers occlude access to the particle  
26 resource. Overall, our results show that micro-scale community ecology on particle surfaces  
27 can have significant impact on carbon turnover in the ocean.

28

## 29 **Introduction**

30 Learning how the composition of ecological community impacts their function is arguably  
31 one of the central challenges in ecology<sup>2-4</sup>. In the case of microbes, this problem is  
32 particularly complex, not only because of the extreme diversity of taxa and genes that make  
33 up microbial communities, but also because community function depends on micro-scale  
34 processes that are hard to measure such as aggregation, dispersal and cell-cell interactions<sup>5</sup>. A  
35 prime example of the link between micro-scale community ecology and large-scale ecosystem  
36 function is found in the biological turnover of particulate organic matter. In the marine  
37 environment, biopolymer particles formed by aggregation of fragments of decaying  
38 organisms, fecal pellets, and extracellular polysaccharides are degraded and consumed by  
39 heterotrophic bacteria that attach to particle surfaces and form dense microbial communities  
40 of large taxonomic and metabolic diversity<sup>6-9</sup>. Because particulate matter tends to sink in the  
41 water column, its degradation in the upper layers of the ocean where oxygen abounds is

42 crucial to sustain the marine food web and prevent the sequestration of carbon and nitrogen  
43 into the deep sea<sup>9-11</sup>. Therefore, particle-attached microbial communities play a fundamental  
44 role by closing the loop of the global carbon cycle and maintaining the balance of nutrients in  
45 marine ecosystems. Although many physical aspects of the bacteria-particle interaction such  
46 as attachment or the effects of flow<sup>12,13</sup> have been well characterized, the possible role that  
47 ecological interactions between microbes may play in controlling the dynamics of particle  
48 colonization and degradation –and thus the ‘mode and tempo’ of the global carbon cycle– is  
49 much less clear.

50 Previous studies have shown that ecological interactions between microbes can play a  
51 significant role in controlling the dynamics of community assembly on particles. Competition  
52 for particle surface and thus primary resource access is likely to be strong among particle-  
53 attached bacteria and interference competition mediated by secondary metabolites can be a  
54 powerful strategy to deter competitors<sup>14,15</sup>. Moreover, over the time scales of particle turn-  
55 over, trophic interactions mediated by byproducts of degradation and primary metabolism can  
56 strongly influence the overall dynamics of bacterial growth<sup>16</sup>: To release the carbon trapped in  
57 particulate matter, bacteria secrete hydrolytic enzymes that deconstruct complex biopolymers  
58 and release soluble sugars into the environment. The bioavailable sugars can in turn be taken  
59 up by nearby cells, thus unlocking a niche for ‘cheaters’ that consume resources but do not  
60 contribute to degradation<sup>16,17</sup>. Likewise, byproducts of primary metabolism such as organic  
61 acids or amino acids that are released to the local environment can be consumed by cross-  
62 feeding bacteria that co-assemble on the particle. On chitin particles, these types of trophic  
63 interaction have been shown to lead to successional waves and invasion of secondary  
64 consumers, which eventually become the numerically dominant members of the community<sup>16</sup>.  
65 These findings led us to hypothesize that interactions across trophic levels at the micro-scale  
66 might alter the catabolism of chitin and consumption of byproducts, possibly affecting the rate  
67 of particle turnover and the conversion from particle to bacterial biomass.

68 To test this hypothesis, in this study we used an isolate collection obtained directly  
69 from particle-attached communities previously shown to colonize in micro-scale  
70 successions<sup>16</sup>. In brief, these communities were enriched on ~50 µm paramagnetic chitin  
71 hydrogel particles incubated in seawater from the coastal ocean (Nahant, MA, USA). Bacteria  
72 were isolated directly from the particles, resulting in a collection that includes taxa such as  
73 *Alteromonadales*, *Flavobacteriaceae*, *Rhodobacterales*, *Vibrionaceae*, and *Oceanospirilliae*.  
74 Notably, the composition of our collection coincides well with the taxonomic profiles of  
75 natural chitinous marine particles collected at 200-500 meters depth in the North Pacific

76 gyre<sup>18</sup>. This overlap between our isolate collection and the taxonomic composition of natural  
77 particle-attached communities suggests that isolates obtained from model particles represent a  
78 relevant set of strains with which to study the effect of ecological interactions on particle  
79 turnover.

80 Bacterial isolates in our collection fall into two coarse-grained functional groups,  
81 defined on the basis of shared physiological characteristics and colonization dynamics<sup>16</sup>. The  
82 first group comprises *primary degraders*, which secrete chitinolytic enzymes, are motile, can  
83 grow rapidly on degradation byproducts and belong to species that tend to appear early during  
84 particle colonization. The second group corresponds to *secondary consumers*, which in  
85 general do not secrete enzymes, cannot grow on chitin, grow poorly if at all on monomers, are  
86 not motile and tend to belong to late successional species (Fig 1A, Fig S1). Although  
87 secondary consumers cannot grow on chitin particles alone, they can reach 100-1000 fold  
88 higher abundance in the presence of primary degraders<sup>16</sup> due to their ability to utilize  
89 metabolic byproducts released by primary degraders during colonization.

90 Our goal in this study is to provide a quantitative description how particle degradation  
91 kinetics depend on the assembly of primary degraders and secondary consumers during  
92 particle colonization. To this end, we first studied how mono-cultures of primary degraders  
93 consumed particles by tracking changes in particle volume over time using high-throughput,  
94 high-resolution time-lapse microscopy (Fig 1B) and guiding our analysis with simple  
95 mathematical models of colonization and resource consumption. Subsequently, we assembled  
96 two-strain communities of primary degraders and secondary consumers and developed a  
97 quantitative phenomenological characterization of the impact of secondary consumers on  
98 degradation. Our results reveal that early colonizing taxa can differ significantly in their  
99 hydrolytic power to break down chitin, that particle degradation is limited by the number of  
100 enzyme-secreting bacteria that colonize the particle surface, and that secondary consumers  
101 effectively become parasites that increase in abundance at the cost of the primary degraders  
102 when co-colonizing on particle surfaces. Furthermore, the presence of parasitic secondary  
103 consumers can delay or even obstruct particle degradation. All these effects suggest that  
104 micro-scale community ecology on particle surfaces plays a major role in controlling  
105 community function by primarily slowing down resource turnover rates.

## 106 **Results**

### 107 **Variability in hydrolytic power: the effect of primary degrader identity and abundance.**

108 We tracked the dynamics of particle consumption by measuring changes in particle volume  
109 over time,  $V(t)$ , using high-throughput time-lapse microscopy of individual chitin micro-  
110 beads. We chose an initial concentration of degrader cells of  $5 \times 10^5$  cells/ml –an upper-bound  
111 estimate of the concentration of degrading bacteria in coastal waters<sup>19</sup>– and quantified  $V(t)$   
112 over a period of 240 h, for four primary degraders and four secondary consumers incubated in  
113 media with no carbon source other than the particle. As expected, secondary consumers did  
114 not grow on particles in monoculture and therefore did not affect  $V(t)$  over the course of the  
115 ten-day time-lapse. For primary degraders, instead,  $V(t)$  was characterized by a long period  
116 of no detectable change, followed by a swelling of the particle and an abrupt collapse (Fig 1C,  
117 Sup. movie 2). Measurements of bacterial growth during degradation showed that bacteria  
118 grew steadily from the beginning of the incubation, despite no apparent change in particle  
119 volume, indicating that depolymerization was a continuous process and that swelling and  
120 collapse occurred only after a critical amount of polymer was consumed (Fig 1C). Particle  
121 swelling indicates that the degradation of cross-linked chitin in the hydrogel allows water  
122 molecules to expand the matrix<sup>20</sup>, while the transition from swelling to collapse indicates the  
123 point at which depolymerization ‘outcompetes’ swelling. The type of degradation curves  
124 observed for primary degraders (Fig. S2), with most of the dynamics concentrated on long  
125 transients, allowed us to quantify the ability of bacteria to consume particles with a single  
126 quantity, the particle half-life,  $\tau_{1/2}$ , i.e. the time it took for the particle to decrease to half its  
127 volume (see methods).

128 We found a remarkable variation in  $\tau_{1/2}$  among the four different primary degraders,  
129 despite the fact that all of these isolates appeared early on in the ecological succession on  
130 chitin particles (Fig 1A). At an initial cell concentration of  $5 \times 10^5$  cells/ml for all primary  
131 degraders, particle half-lives varied from  $\sim 30$  h for the fastest degrader (a strain of the genus  
132 *Psychromonas*, named psych6C06) to  $\sim 200$  h for the slow degraders (a strain of *Vibrio*  
133 *nigripulchritudo* named vnigri6D03) (Fig 1D). The large number of chitinase copies in  
134 psych6C06 (19 copies) suggested that gene dosage played a role in controlling the hydrolytic  
135 power of the strains. However, overall the differences between  $\tau_{1/2}$  among primary degraders  
136 could not be clearly correlated to variation in gene content, suggesting instead that expression  
137 levels and the ‘quality’ of extracellular enzymes played a more significant role. Gene content  
138 did however distinguished primary and secondary consumers: degraders tended to encode the  
139 genomic potential to transport chitin monomers (N-acetylglucosamine specific PTS  
140 transporters), use monomers as chemotaxis signals and attach to chitin surfaces, features  
141 which tended to be absent in secondary consumers (Fig 1E, Table S1).

142 Chitin degradation is intrinsically linked to the production of public goods such as  
143 chitinases and as such can be subject to cooperative growth dynamics<sup>21</sup>, i.e. a positive  
144 dependency between cell densities and growth or depolymerization rates. If cooperativity  
145 does play a role, half degradation times would be highly sensitive to cell numbers, increasing  
146 disproportionately in cases where cell load is low. To test the relevance of this phenomenon  
147 and, in general, to study how  $\tau_{1/2}$  depended on initial conditions, we measured degradation  
148 kinetics as a function of the initial concentration of primary degrader  $[B_p]_0$ , which until now  
149 was arbitrarily set to  $5 \times 10^5$  cells/ml. In addition, we guided our analysis with simple models  
150 of particle degradation and bacterial growth. To construct these models we assumed that  
151 particle depolymerization was proportional to the density of bacteria. We studied two  
152 possibilities, i) that bacteria grew cooperatively, i.e. with growth rate proportional to  $B^n$  and  
153  $n > 1$ , and ii) that cooperativity played no significant role and growth and occurred at fixed,  
154 density independent per capita rates. Assuming that  $\tau_{1/2}$  depends linearly on the speed of  
155 depolymerization, model i) predicts that  $\tau_{1/2}$  should scale as  $-1/[B_p]_0$ , whereas model ii)  
156 predicts that  $\tau_{1/2}$  should scale as  $-\log([B_p]_0)$  (Methods and Supplementary Text, Fig. 2F).

157 In agreement with the simplest model with no cooperativity (ii), we find a linear  
158 relation between  $\tau_{1/2}$  and  $\log([B_p]_0)$  (Fig 2, Table S2). This behavior implies that the  
159 particle half-life is controlled by simple mass action kinetics<sup>22</sup> that—at least in the conditions  
160 of our experiment—are not influenced by cooperativity. More precisely, we find that  $\tau_{1/2}$  is  
161 well described by the following expression,

$$\tau_{1/2} \sim t_0 + \frac{1}{\beta} \log\left(\frac{1}{[B_p]_0}\right) \quad (1)$$

162 where  $t_0$  is the intercept of the lines in Fig 2E and represents a timescale to degradation that is  
163 intrinsic to each strain,  $\beta$  is the slope and represents the per-capita contribution to the  
164 degradation process and  $-\log\left(\frac{1}{[B_p]_0}\right)$  captures the effect of the primary degrader concentration  
165 in the local environment, akin to a chemical potential for the cell-particle reaction.

167 The relationship found in (1) shows that the turnover of particulate organic matter  
168 depends on the load of primary degraders in the *milieu* in a simple, predictable manner. The  
169 lack of a cooperativity observed suggests that the possible benefits that bacteria may derive  
170 from ‘teaming up’ are effectively offset by local competition for resources between  
171 neighbors. Overall, our results indicate that variation in the composition and abundance of

172 primary degraders can have a significant impact on the rate of particulate organic matter  
173 turnover.

#### 174 **Secondary consumers behave as parasites during particle degradation**

175 To understand how ecological interactions between primary degraders and secondary  
176 consumers influence particle degradation, we focused our analysis on two primary degraders  
177 and one secondary consumer. We chose the relatively ‘slow’ degrader, vsple1A01 (Fig 1CD)  
178 a member of the *Vibrio splendidus* clade, the most abundant group of marine vibrios in  
179 coastal seawaters<sup>23</sup>, and the relatively ‘fast’ degrader, *Pseudoalteromonas sp.* palte3D05 (Fig  
180 S2), a common member of heterotrophic bacterioplankton communities<sup>24,25</sup>. Secondary  
181 consumers, or strains unable to degrade chitin, have previously been found to invade particle-  
182 attached communities and to become numerically dominant during community assembly<sup>16</sup>  
183 (Fig. 1A). We focused our efforts on a secondary consumer cultivated from seawater-  
184 incubated chitin particles, a strain of the genus *Maribacter* (a type of marine *Flavobacteria*),  
185 that we here call marib6B07. As with other secondary consumers, marib6B07 is able to  
186 crossfeed when grown in co-culture with degraders<sup>16</sup>. Interestingly, genome sequences  
187 marib6B07 and other secondary consumers show that, despite their inability to degrade chitin  
188 under laboratory conditions, these organisms can contain chitinases (marib6B07 has two), but  
189 in general lack genes for *N*-acetylglucosamine specific chemotaxis, *N*-acetylglucosamine  
190 specific phosphotransferase (PTS) transport and chitin-binding, all of which tend to be present  
191 in multiple copies in the genomes of primary degraders (Table S1). These differences in the  
192 genomes of primary degraders and secondary consumers suggest that their functional roles in  
193 the community may be determined by the interaction between multiple traits, such as the  
194 ability to chemotax towards breakdown products of chitin and to transport them into the  
195 periplasm.

196 Co-incubation of mari6B07 with vsple1A01 and palte3D05 showed that mari6B07  
197 increased  $\tau_{1/2}$  relative to primary degrader monocultures (Fig 3A), implying that the cross-  
198 feeder impaired the ability of degrader populations to depolymerize the particle. To study this  
199 phenomenon in a quantitative manner, we measured how  $\tau_{1/2}$  responded to changes in the  
200 initial concentration of secondary consumer,  $[B_s]_0$ , with the number of cells of the primary  
201 degrader fixed at a given concentration ( $[B_p]_0 \approx 1.25 \times 10^5$  cells/ml) (Fig 3A, Fig S5A). We  
202 found that over low  $[B_s]_0$ ,  $\tau_{1/2}$  increased roughly linearly, such that a one-fold increase in the  
203 secondary consumer  $[B_s]_0$  had approximately the same effect as a ten-fold reduction of the  
204 primary degrader  $[B_p]_0$  in monoculture.

205 Surprisingly, at a threshold  $[B_s]_0$  we observed an abrupt increase in  $\tau_{1/2}$ , to the extent  
206 that particle degradation did not occur within the 240 h imaging period, suggesting that the  
207 population of primary producers might have been inhibited from colonization and/or growth.  
208 To investigate how this phenomenon depended on the composition of the two-strain  
209 community, we varied the abundance of the primary degraders,  $[B_p]_0$  and secondary  
210 consumer  $[B_s]_0$ , in order to obtain degradation phase planes (Fig 3B). The degradation phase  
211 planes show that complete inhibition did not depend on the total concentration of the  
212 secondary consumer,  $[B_s]_0$ , but on the ratio of secondary consumer to primary degrader,  
213  $\gamma = [B_s]_0/[B_p]_0$  (Fig 3B,C). For the slow degrader, *vsple1A01*, degradation was blocked at  
214  $\gamma > \sim 1$ , whereas for the fast degrader, *palte3D05*, degradation was blocked above a ratio of  
215  $\gamma > \sim 16$ , showing that the slow degrader was more sensitive to the inhibitory effects of  
216 secondary consumer *marib6B07* than the fast degrader. This analysis indicates that the  
217 balance between the relative abundances of secondary consumers to primary degraders in the  
218 environment, in addition to the degradation kinetics of the primary consumer, may be an  
219 important parameter that dictates the turnover rates of carbon over short time-scales (see  
220 Discussion).

221 Quantification of the abundance of each strain in co-culture before and after particle  
222 degradation showed that the interaction between primary degrader and secondary consumer is  
223 parasitic i.e. positive for the consumer, negative for the degrader. CFU counts during the time  
224 course of degradation in co-cultures of *vsple1A01* and *marib6B07* showed that primary  
225 degrader growth rate and yield were lower than in monoculture, and that the “loss” of  
226 degrader cells was compensated by the growth of secondary consumers (Fig 3C). Secondary  
227 consumers doubled approximately 5 times by the time of particle collapse, in contrast to their  
228 zero doublings in monoculture (see Fig S5B). Notably, the total yield of the co-culture was  
229 always equal or lower to the yield of the mono-culture, highlighting the parasitic nature of the  
230 interaction. Thus, secondary consumers, whose growth is facilitated by primary degraders,  
231 exert a negative feedback on degraders, limiting their ability to consumer produced resources  
232 and potentially their own growth.

233 Given the higher ratio of secondary consumer to degrader ( $\gamma$ ) required to inhibit  
234 *palte3D05* compared to *vsple1A01*, we hypothesized that “slow degraders” might be more  
235 susceptible to the detrimental effect of secondary consumers. To test this hypothesis as well  
236 as whether the observed parasitic interactions can be generalized to other primary degrader –  
237 secondary consumer pairs, we measured the effect of co-culture at  $\gamma = 1$  ratio on particle

238 degradation for all primary degraders (Fig 1D) with four different secondary consumers  
239 (including marib6B07) of diverse taxonomic origins, all of which were co-isolated from the  
240 same chitin-attached communities. The results showed that while the fast degraders  
241 psych6C06 and palte3D05 were only mildly affected by co-culture with secondary consumers  
242 at  $\gamma = 1$ , the slow degraders vsple1A01 and vnigr6D03 were susceptible to the presence of  
243 secondary consumers (Fig 4), with the slowest degrader, vnigr6D03 being inhibited by all  
244 four secondary consumers, three of which caused total blockage of particle consumption.  
245 These data further indicate that parasitic interactions between degraders and consumers are  
246 not dependent on specific taxa, but rather on the hydrolytic power of the degrader.

247 Consistent with the observation that interactions are not specific to strains or species  
248 but to functional roles (i.e. secondary consumer, primary degrader), we did not find evidence  
249 of chemical antagonism from secondary consumers to degraders. Agar plate assays designed  
250 to detect secreted inhibitory factors showed no interaction between the secondary consumer  
251 and primary degraders. Moreover, co-cultures of vsple1A01 and palte3D05 with marib6B07  
252 in liquid media supplemented with *N*-acetylglucosamine (the monomer of chitin), as sole  
253 carbon source showed no decrease in growth rates (Fig S8). This suggests that either an  
254 antagonistic factor is only secreted in the particle environment, or what is more likely, that the  
255 observed inhibition of primary degrader growth is based on interference with physical  
256 processes that only take place when resources are concentrated on particles (e.g. colonization,  
257 attachment, etc.).

## 258 Discussion

259 Despite the significant efforts put into understanding the factors that drive the turnover of  
260 organic matter in the ocean<sup>26,27</sup>, the potential role that microbial interactions may play in this  
261 process has remained relatively unexplored. Our study leveraged a simplified model based on  
262 wild isolates that naturally colonize chitin particles to dissect this question. We provided  
263 evidence that both differences in primary degrader type and the ratio of primary degrader to  
264 secondary consumer can significantly alter particle degradation kinetics. Remarkably, we  
265 show that even in the ideal conditions of our experiments (no N limitation, high number of  
266 cells pre-grown in rich media) particle turnover times can be as high as 200 hours or more,  
267 that is, in the same range as the residence time of particles in the ocean's mixed layer.  
268 Moreover, we showed interactions between primary degraders and secondary consumers lead  
269 to a significant increase in particle turnover times. This result is in agreement with our  
270 previous observation of colonization dynamics in natural seawater, which showed that



271 secondary consumers “displace” primary degraders from particles, becoming the dominant  
272 members of the particle attached community after a brief initial period of colonization by  
273 degraders<sup>16</sup>. Taken together these results suggest that the micro-scale community ecology of  
274 particle-attached bacteria plays an important role in controlling rates of carbon turnover in the  
275 ocean.

276 Although in this study we do not identify a direct mechanism for the inhibitory effect  
277 of secondary consumers on primary degraders, our results suggest that the effect is not  
278 dependent on chemical interactions, which tend to be strain specific. Instead, the fact that we  
279 were able to observe degradation inhibition with different secondary consumers in a dose-  
280 specific manner suggests that a role of physical processes such as occlusion of the particle  
281 surface or an alteration of resource gradients around the particle, which are likely to occur  
282 regardless of species identity. Furthermore, this notion is consistent with the fact that  
283 degradation inhibition was only observed when bacteria grow on particles, and that the  
284 consequences of adding secondary consumers to the environment are similar to those of  
285 reducing the primary degrader load (and hence their particle colonization rate). Finally, the  
286 fact that the secondary consumer load required to induce degradation inhibition is anti-  
287 correlated with the hydrolytic power of the degrader reinforces the notion that particle  
288 depolymerization and secondary consumer growth are competing processes. Further work  
289 should aim at identifying the precise mechanisms that mediate the negative feedback from  
290 secondary consumers to degraders, tracking single cell behavior on and around particles as  
291 well as the interplay between spatial structure enzymatic activity.

## 292 **Materials and Methods**

### 293 **Bacterial culturing conditions**

294 Bacterial strains used in this study were previously isolated from model chitin particles<sup>16</sup>.  
295 Strains were streaked from glycerol stocks onto Marine Broth 2216 (Difco #279110) 1.5 %  
296 agar (BD #214010) plates. After 48 h, single colonies were transferred to 2 ml liquid Marine  
297 Broth 2216 and incubated at room temperature, shaking at 200 rpm. Saturated liquid cultures  
298 were harvested after 48 h by centrifugation for 8 minutes at 3000 rpm (Eppendorf 5415D,  
299 Rotor F45-24-11) and washed two times with Tibbles–Rawling minimal media (see  
300 supplemental material of ref <sup>16</sup> for a detailed recipe). Optical density (OD) 600 nm was  
301 determined in 200 µl (50 µl culture, 150 µl minimal media) in a clear 96-well plate (VWR  
302 10062-900) with a spectrophotometer (Tecan Infinite F500). Cell numbers were normalized to  
303 the desired initial concentrations using a three-point linear calibration between OD 600 nm

304 and direct cell counts determined with a Guava easyCyte Benchtop Flow Cytometer for each  
305 strain.

306

### 307 **Particle degradation experiments**

308 Particle degradation experiments were performed in clear 96 well plates (VWR 10062-900).  
309 Each well contained 180  $\mu$ l Tibbles–Rawling minimal, bacterial cells at defined  
310 concentrations prepared as described above, and approximately 100 chitin magnetic beads  
311 (New England Biolabs #E8036L). Before being used in the experiments, the chitin magnetic  
312 beads storage buffer was removed using a neodymium magnet (McMaster-Carr #5862K38) to  
313 retain the beads. Beads were washed twice in Tibbles–Rawling minimal media and size  
314 selected using 100 $\mu$ m and 40 $\mu$ m strainers (VWR, #10199-658 and #10199-654, respectively).

315 For Fig 1B, the colonized particle was stained in the well after 24 h by adding Syto9 (Thermo  
316 Fisher, S34854), 500 nM final concentration for 1h at room temperature in the dark.  
317 Microscopy was performed on an EVOS FL Auto Imaging System (Fisher #AMAFD1000)  
318 using a GFP lightcube (Thermo Fisher AMEP4651) and a 20x fluorite, long working distance  
319 objective (Fisher #AMEP4682, NA 0.40, WD 3.1 mm) and the softwares' (revision 31201)  
320 Z-stack function. 3D-reconstruction was done using the ImageJ distribution Fiji (ImageJ  
321 1.51N).

### 322 **Time lapse imaging**

323 Phase contrast time lapse images were acquired with an EVOS FL Auto Imaging System  
324 (Fisher #AMAFD1000) using the EVOS software (revision 31201) and a 20x fluorite, long  
325 working distance, phase-contrast objective (Fisher #AMEP4682, NA 0.40, WD 3.1 mm).  
326 Images were manually focused for each particle to capture the maximum cross section area  
327 (see Fig 1C, upper panel). Time lapses ran a maximum of 240 h, with images acquired every  
328 2 h. To minimize evaporation effects, culturing plates were wrapped in para film during the  
329 time-lapse experiments and outer wells filled with 200  $\mu$ l water.

### 330 **Image processing and Volume quantification**

331 Phase contrast images were analyzed using the ImageJ distribution Fiji (ImageJ 1.51N). A  
332 polygonal shape was manually drawn around the particle to determine the area of the  
333 particles' cross-section. To convert from cross section area in square pixel (1 pixel = 0.4545  
334  $\mu$ m) to volume (in  $\mu$ m<sup>3</sup>), we assumed a spherical shape of the particles. Volumes were  
335 normalized to initial volume at t=0 h to account for variation in particle sizes. In order to

336 estimate the particle half-life, we fitted a sigmoidal function  $\frac{1}{1+e^{(k(x-\tau_{1/2}))}}$  using MATLAB  
337 (Version R2016b) and the ‘fit’ function with initial values for  $k$  (0.5) and  $\tau_{1/2}$  (initial  
338 estimates vary for each strain), constraining both variables to positive values (see also Fig S3  
339 for examples of sigmoidal fits to the data).

#### 340 **Co-culture experiments**

341 Cell counts were obtained by sampling 100  $\mu$ l from 96 well culture plates (inoculated with  
342 170  $\mu$ l minimal media, 2x10  $\mu$ l of the normalized bacterial culture, and 10  $\mu$ l particles as  
343 described above). Imaging was performed as described above. For CFU counts, samples were  
344 vortexed thoroughly to detach cells from particles and 10  $\mu$ l were plated in  $10^{-2}$  and  $10^{-3}$   
345 dilutions in replicates on MB2216 agar plates using rattler beads (Zymo S1001). After 72 h,  
346 colonies were counted to obtain CFUs.

#### 347 **DNA quantification**

348 To quantify DNA as a proxy for biomass from mono cultures in 96 well plates, wells were  
349 mixed thoroughly by pipetting and 100  $\mu$ l of each well (including the particles) were sampled  
350 and frozen at -20 °C for subsequent analysis. Cells were lysed by thawing and boiling (95 °C,  
351 10 min) 10  $\mu$ l of each sample. Lysed samples were diluted 1:10 in TE buffer and quantified  
352 using Quant-it pico green (Fisher # P7589) standard protocols.

#### 353 **Strain genome annotation**

354 The genomes are deposited at NCBI under Bioproject # PRJNA414740 and the respective  
355 accession numbers in Table S1. Assembled genomes were annotated using RAST and  
356 genome content was parsed using text parsing of the genome annotations for Chi, ChB, GTx.

357

#### 358 **Acknowledgements**

359 The authors wish to thank members of the Cordero lab for thoughtful discussions. This  
360 research was supported by NSF grant OCE-1658451, European Starting Grant no. 336938.  
361 OXC was also supported by the Simons Early Career Award 410104 and the Alfred P Sloan  
362 fellowship FG-20166236.

363 **Figures**

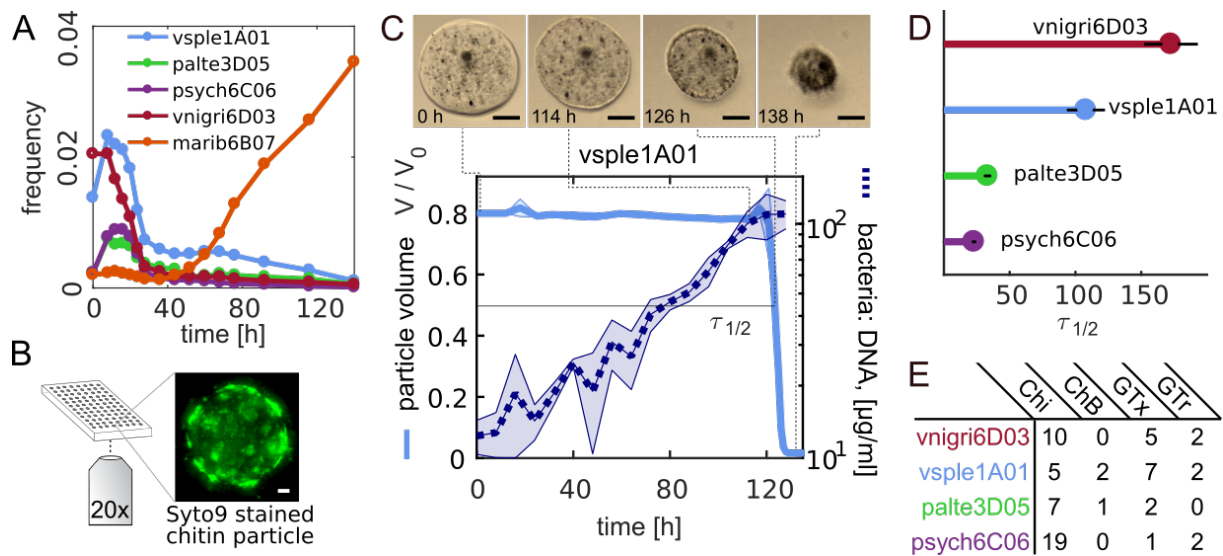

364

365 **Figure 1: Particle degradation dynamics of bacteria isolated from chitin micro-particles.**

366 **A)** Culture independent dynamics of four primary degraders (vsple1A01, palte3D05, psych6C06,  
 367 vnigri6D03) and a secondary consumer (marib6B07). Trajectories shown depict dynamics of selected  
 368 taxa in particle incubations with raw seawater. Data from ref. 16. **B)** In the laboratory, chitin particles  
 369 immersed in bacterial suspensions are imaged at the bottom of microtiter plates for up to 240 h. The  
 370 particle image corresponds to DNA stained palte3D05 after 24 h, showing the formation of bacteria  
 371 micro-colonies on the particle surface. Scale bar corresponds to 10 μm. For a 3D animation of the  
 372 image, see supplemental video 1. **C)** Upper panel: Phase contrast (20x) micrographs of a chitin  
 373 particle cross section taken at different time points during incubation with vsple1A01. Scale bar: 30  
 374 μm. (See also supplementary video 2). Lower panel: Particle volume over time normalized to initial  
 375 volume (solid line) and bacterial abundance as measured by the amount of DNA extracted from ~100  
 376 particles at different points of colonization (dashed line). The standard deviation of measurements  
 377 was calculated using three replicate particles from the same well, and three different bulk incubations  
 378 for DNA. **D)** Particle half-lives for the four different degraders tested with an inoculum of ~5x10<sup>5</sup> cells  
 379 per ml. **E)** Number of gene copies of chitinases (Chi), chitin binding proteins (ChB), GlcNAc specific  
 380 chemotaxis (GTx) and transport (GTr) genes. See also Supplementary Table 1.

381

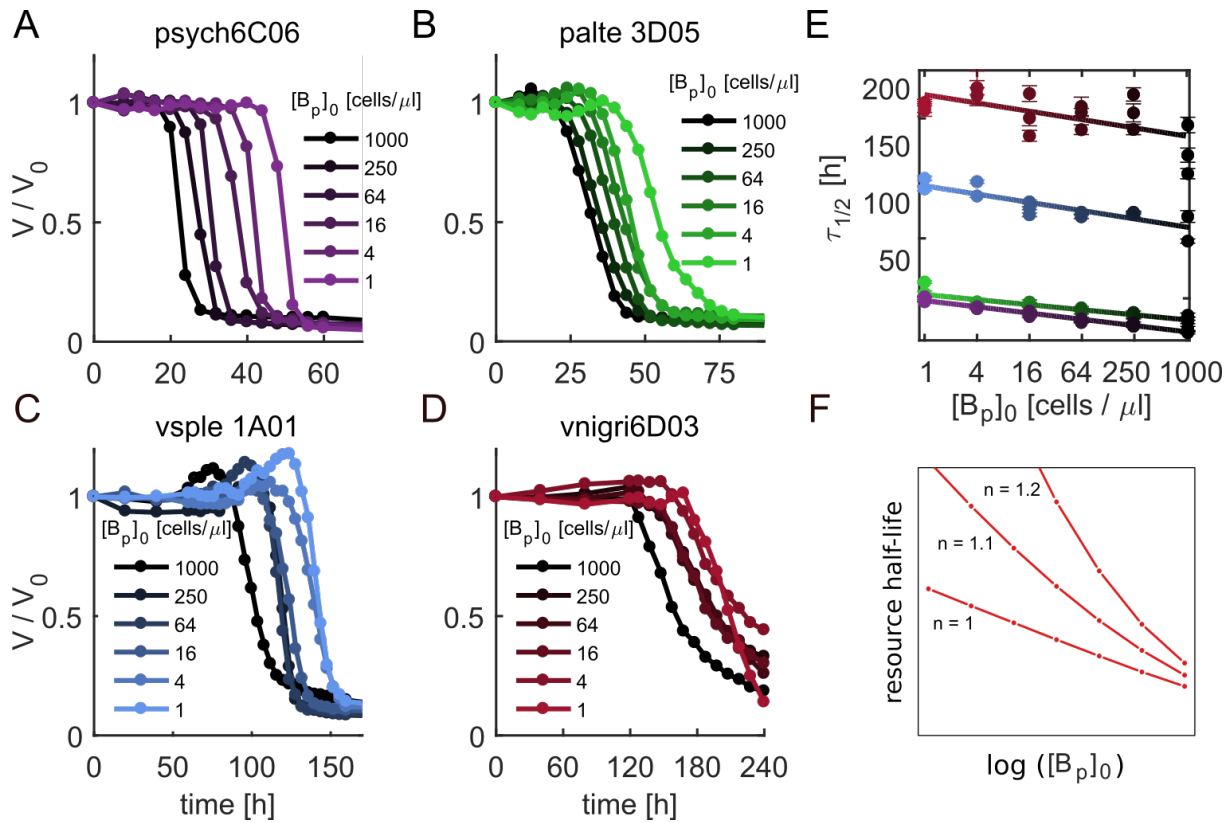

382

383 **Figure 2. Effect of cell initial cell concentration on particle degradation kinetics. A-D)** Mean  
 384 particle volume over time for primary degraders, over a range of initial inoculum concentrations,  $[B_p]_0$   
 385 (See Fig S3). **E)** Linear dependency between the  $\log_2([B_p]_0)$  and the particle half-life as predicted by  
 386 equation (1) validating the simple model of degradation without cooperativity (See also table S2). **F)**  
 387 Prediction for  $\log([B_p]_0)$  vs half-life based on models with ( $n > 1$ ) or without cooperativity ( $n = 1$ ).

388

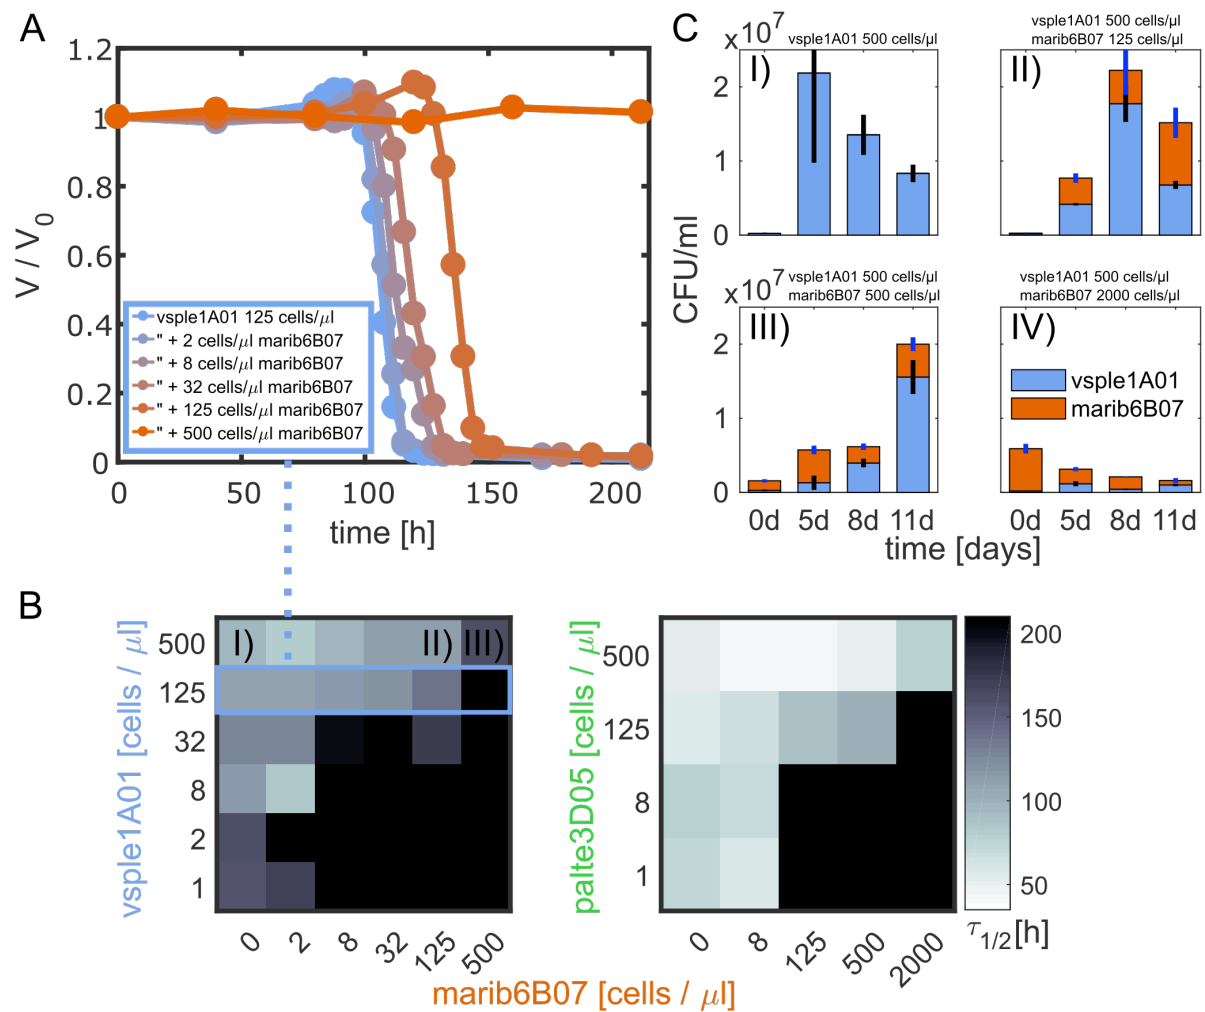

389

390 **Figure 3: Secondary consumers inhibit degradation.** **A)** Particle degradation curves with different  
 391 marib6b07 concentrations. At increasing concentrations of the secondary consumer the particle half-  
 392 life increases disproportionately beyond the 220 h time limit. **B)** Heat maps depict  $\tau_{1/2}$  as a function of  
 393 different primary degrader and secondary consumer inoculum concentrations and show that particle  
 394 half-lives depend on the relative concentrations of primary degrader and secondary consumer cells.  
 395 Color scale is the same for both heat maps. The blue highlighted row of the heat map corresponds to  
 396 the degradation curves in A). For all degradation curves used for the heat maps see FigS6 and FigS7,  
 397 respectively. **C)** CFUs of vsple1A01 and marib6B07 during co-culture on chitin particles, showing  
 398 that marib6B07 acts as a parasite that grows “at the expense” of vsple1A01’s yield. I) vsple1A01 in  
 399 mono-culture. Particle degradation observed at ~5 days. II,III) co-cultures, particle degradation  
 400 observed at ~8 d and ~11 d, respectively. IV) co-culture: no degradation observed (standard deviations  
 401 for N=3 replicates). Decrease in CFUs is due to loss of viability after degradation.

402

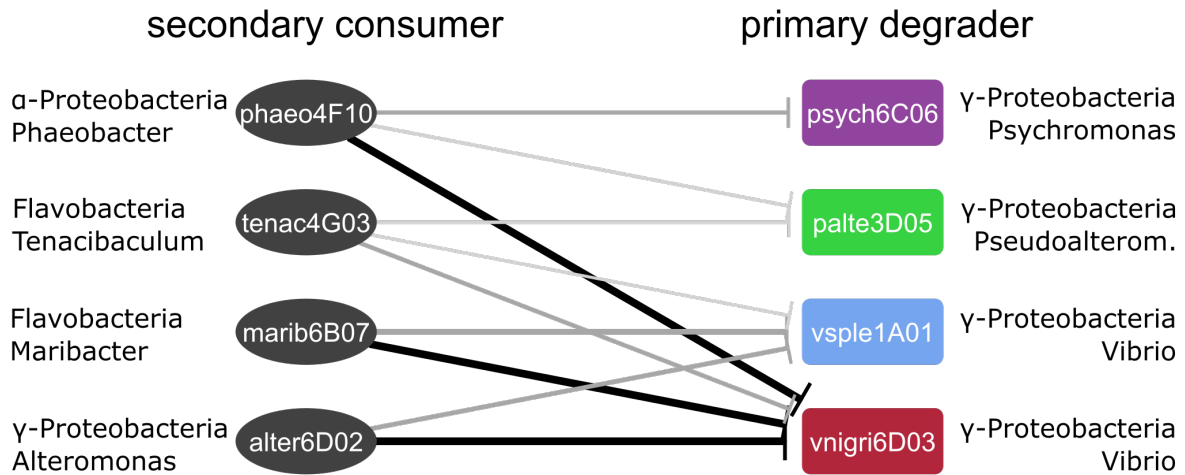

403

404 **Figure 4: Degradation inhibition is specific to functional groups, not strains.** The network depicts  
 405 the effect of four different secondary consumers from diverse taxonomic origins on the characteristic  
 406 half live  $\tau_{1/2}$  during particle degradation by primary degraders with different hydrolytic power).  
 407 Network edge width is proportional to  $\frac{\tau_{1/2 \text{ co-culture}}}{\tau_{1/2 \text{ mono-culture}}}$ . Edges are drawn between secondary  
 408 consumers and primary degraders when the mean (n=3) half lives  $\tau_{1/2}$  determined from the  
 409 degradation curves of mono- and co-cultures were determined to be statistically different by one-way  
 410 ANOVA. Black: complete inhibition, no  $\tau_{1/2}$  determined in co-culture, dark grey:  $p < 0.05$ , light  
 411 grey:  $p < 0.1$ , respectively. See Figure S9 for raw data.

## 412 **References**

- 413 1. Deleersnijder, E., Beckers, J.-M. & Delhez, E. J. M. The Residence Time of Settling  
414 Particles in the Surface Mixed Layer. *Environ. Fluid Mech.* **6**, 25–42 (2006).
- 415 2. Loreau, M. Biodiversity and Ecosystem Functioning: Current Knowledge and Future  
416 Challenges. *Science (80-. )*. **294**, 804–808 (2001).
- 417 3. Balvanera, P. *et al.* Quantifying the evidence for biodiversity effects on ecosystem  
418 functioning and services. *Ecol. Lett.* **9**, 1146–1156 (2006).
- 419 4. Hector, A. & Bagchi, R. Biodiversity and ecosystem multifunctionality. *Nature* **448**,  
420 188–190 (2007).
- 421 5. Cordero, O. X. & Datta, M. S. Microbial interactions and community assembly at  
422 microscales. *Curr. Opin. Microbiol.* **31**, 227–234 (2016).
- 423 6. Volkman, J. K. & Tanoue, E. Chemical and Biological Studies of Particulate Organic  
424 Matter in the Ocean. *J. Oceanogr.* **58**, 265–279 (2002).
- 425 7. Passow, U. Transparent exopolymer particles (TEP) in aquatic environments. *Prog.*  
426 *Oceanogr.* **55**, 287–333 (2002).
- 427 8. Alldredge, A. L. & Silver, M. W. Characteristics, dynamics and significance of marine  
428 snow. *Prog. Oceanogr.* **20**, 41–82 (1988).
- 429 9. Engel, A., Thoms, S., Riebesell, U., Rochelle-Newall, E. & Zondervan, I.  
430 Polysaccharide aggregation as a potential sink of marine dissolved organic carbon.  
431 *Nature* **428**, 929–32 (2004).
- 432 10. Andrew McDonnell and Ken Buesseler. Marine Particle Dynamics: Sinking Velocities,  
433 Size Distributions, Fluxes, and Microbial Degradation Rates : Recent Dissertations and  
434 Theses : MIT/WHOI Joint Program. *PhD Thesis* (2011).
- 435 11. Yu, C., Lee, A. M., Bassler, B. L. & Roseman, S. Chitin utilization by marine bacteria.  
436 A physiological function for bacterial adhesion to immobilized carbohydrates. *J. Biol.*  
437 *Chem.* **266**, 24260–7 (1991).
- 438 12. Stocker, R., Seymour, J. R., Samadani, A., Hunt, D. E. & Polz, M. F. Rapid  
439 chemotactic response enables marine bacteria to exploit ephemeral microscale nutrient  
440 patches. *Proc. Natl. Acad. Sci.* **105**, 4209–4214 (2008).



- 441 13. Stocker, R. Marine microbes see a sea of gradients. *Science* **338**, 628–33 (2012).
- 442 14. Long, R. A. *et al.* Antagonistic interactions among marine bacteria impede the  
443 proliferation of *Vibrio cholerae*. *Appl. Environ. Microbiol.* **71**, 8531–6 (2005).
- 444 15. Long, R. A. & Azam, F. Antagonistic interactions among marine pelagic bacteria.  
445 *Appl. Environ. Microbiol.* **67**, 4975–4983 (2001).
- 446 16. Datta, M. S., Sliwerska, E., Gore, J., Polz, M. F. & Cordero, O. X. Microbial  
447 interactions lead to rapid micro-scale successions on model marine particles. *Nat.*  
448 *Commun.* **7**, 11965 (2016).
- 449 17. Jagmann, N., von Rekowski, K. S. & Philipp, B. Interactions of bacteria with different  
450 mechanisms for chitin degradation result in the formation of a mixed-species biofilm.  
451 *FEMS Microbiol. Lett.* **326**, 69–75 (2012).
- 452 18. Fontanez, K. M., Eppley, J. M., Samo, T. J., Karl, D. M. & DeLong, E. F. Microbial  
453 community structure and function on sinking particles in the North Pacific Subtropical  
454 Gyre. *Front. Microbiol.* **6**, 469 (2015).
- 455 19. Whitman, W. B., Coleman, D. C. & Wiebe, W. J. Prokaryotes: The unseen majority.  
456 *Proc. Natl. Acad. Sci.* **95**, 6578–6583 (1998).
- 457 20. T. K. L. Meyvis, S. C. De Smedt, \* and, Demeester, J. & Hennink, W. E. Influence of  
458 the Degradation Mechanism of Hydrogels on Their Elastic and Swelling Properties  
459 during Degradation. (2000). doi:10.1021/MA992131U
- 460 21. Drescher, K., Nadell, C. D., Stone, H. A., Wingreen, N. S. & Bassler, B. L. Solutions  
461 to the public goods dilemma in bacterial biofilms. *Curr. Biol.* **24**, 50–5 (2014).
- 462 22. Kovárová-Kovar, K. & Egli, T. Growth kinetics of suspended microbial cells: from  
463 single-substrate-controlled growth to mixed-substrate kinetics. *Microbiol. Mol. Biol.*  
464 *Rev.* **62**, 646–66 (1998).
- 465 23. Le Roux, F. *et al.* Genome sequence of *Vibrio splendidus* : an abundant planctonic  
466 marine species with a large genotypic diversity. *Environ. Microbiol.* **11**, 1959–1970  
467 (2009).
- 468 24. Lara, E. *et al.* Life-Style and Genome Structure of Marine Pseudoalteromonas  
469 Siphovirus B8b Isolated from the Northwestern Mediterranean Sea. *PLoS One* **10**,  
470 e0114829 (2015).

- 471 25. Romanenko, L. A. *et al.* Pseudoalteromonas agarivorans sp. nov., a novel marine  
472 agarolytic bacterium. *Int. J. Syst. Evol. Microbiol.* **53**, 125–131 (2003).
- 473 26. Jiao, N. *et al.* Microbial production of recalcitrant dissolved organic matter: long-term  
474 carbon storage in the global ocean. *Nat. Rev. Microbiol.* **8**, 593–9 (2010).
- 475 27. Kirchman, D. L. *Microbial Ecology of the Oceans*, 2nd Edition - David L. Kirchman.  
476  
477  
478

479  
480

## Supplementary Material

### 481 **Micro-scale ecology regulates particulate organic matter turnover in model marine** 482 **microbial communities**

483  
484  
485

Tim N. Enke<sup>1,2</sup>, Gabriel E. Leventhal<sup>1</sup>, Matthew Metzger<sup>1</sup>, José T. Saavedra<sup>1</sup> and Otto X.  
Cordero<sup>1</sup>

486 <sup>1</sup> Department of Civil and Environmental Engineering, Massachusetts Institute of Technology

487 <sup>2</sup> Department of Environmental Systems Science, ETH Zurich

488

### 489 **Supplementary Text**

#### 490 **Modeling of particle half-life for non-cooperative degraders**

491 The degradation of a chitin particle by bacteria can be modeled in a simple way by taking  
492 into account two processes: (i) Free-living bacteria attach to the particle surface at a rate,  $a$ ,  
493 proportional to their planktonic concentration,  $[B0]$ , such that  $a = a_0[B0]$ , where  $a_0$  is the  
494 attachment rate per bacterial cell; (ii) Attached cells degrade the particle at a rate  $p$ , and chitin  
495 monomers are converted to bacterial biomass at a conversion factor  $r$ . Note, that the  
496 conversion factor  $r$  may take into account the loss of monomers to the environment. This  
497 results in a set of differential equations for the amount of bacterial biomass,  $B(t)$ , and the total  
498 amount of particle,  $R(t)$ ,

499

$$500 \quad \frac{dB}{dt} = a + rpB, \quad B(0) = 0 \quad (1)$$

$$\frac{dR}{dt} = -pB, \quad R(0) = R_0 \quad (2)$$

501

502 In the above parametrization, the degradation of a chitin particle is described by four  
503 independent parameters: (i) the total size of the particle,  $R_0$ ; (ii) the attachment rate of  
504 bacteria,  $a$ ; (iii) the biomass conversion rate,  $r$ ; and (iv) the degradation rate;  $p$ . There is,  
505 however, a more canonical parametrization: Let  $b(t) = B(t)/r$ ,  $\alpha = a/r$  and  $\beta = rp$ . Then,

506

$$507 \quad \frac{dB}{dt} = \alpha + \beta B, \quad B(0) = 0 \quad (3)$$

$$\frac{dR}{dt} = -\beta B, \quad R(0) = R_0 \quad (4)$$

508

509 which, for initial conditions  $B(0) = 0$  and  $R(0) = R_0$ , are solved by the equations

$$B(t) = \frac{\alpha}{\beta}(e^{\beta t} - 1) \quad (5)$$

$$R(t) = R_0 - \frac{\alpha}{\beta}(e^{\beta t} - 1) + \alpha t \quad (6)$$

510

511 From Eq. 6 the time required to fully degrade the particle can be found by numerically  
512 solving the transcendental equation for  $R(T) = R_0$ . Additional analytical insight can be  
513 gained, however, by assuming that attachment is slow compared to growth, and  
514 hence  $R(T) = R_0 - B(T)$ . Furthermore, we additionally assume that  $rpT \gg 0$  and hence  
515  $\ln(e^{rpT} - 1) \approx rpT$ . This leads to a simple expression for the total degradation time,  $T$ ,  
516 required to fully degrade a particle,

$$T = \frac{1}{\beta}(\ln(R_0) + \ln(\beta) - \ln(\alpha)) \quad (5)$$

517 Hence, the degradation time  $T$  depends linearly on the logarithm of the attachment rate  $\alpha$ , and  
518 hence the planktonic concentration of bacteria (see Fig. S4)

519

#### 520 **Expected half-life for cooperative degraders.**

521 To calculate half-lives in the presence of cooperative growth we used the simple model

522

$$523 \quad \frac{dB}{dt} = rB^n, \quad (6)$$

$$523 \quad \frac{dR}{dt} = -uB, \quad R(0) = R_0 \quad (7)$$

524

525 Unfortunately it is not practical to work with the analytical solutions of these set of equations,  
526 so we turn to numerical simulations in which we calculate the time it takes to consume half of  
527 the resources ( $R(\tau_{1/2}) = R(0)/2$ ). For this simulations we use  $r = 0.01$  and  $u = 0.5$ , and  
528 explore the shape of the  $B(0)$  vs  $\tau_{1/2}$  relation by fitting a log linear or a power law  
529 relationship. We find that quickly as  $n > 1$  the relationship converges to  $\tau_{1/2} \sim 1/B(0)$ .

530 Simulations were performed in R using the dSolve package.

531

532

533

534

535 **Supplementary Figures:**

536

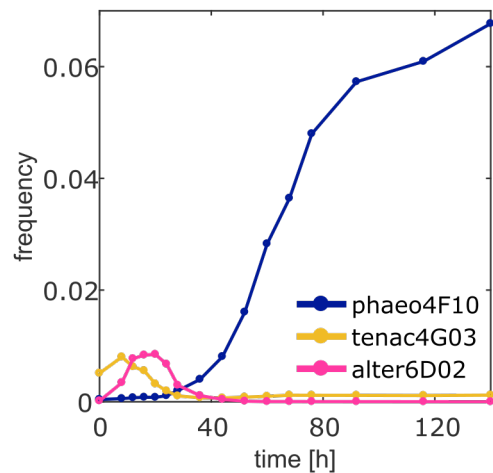

537

538 **Figure S1: Culture independent dynamics of secondary consumers** phaeo4F10,  
539 tenac4G03 and alter6D02. Trajectories shown depict dynamics of selected taxa from particle  
540 incubations with raw seawater, where other taxa were present. Data from <sup>16</sup>.

541

542

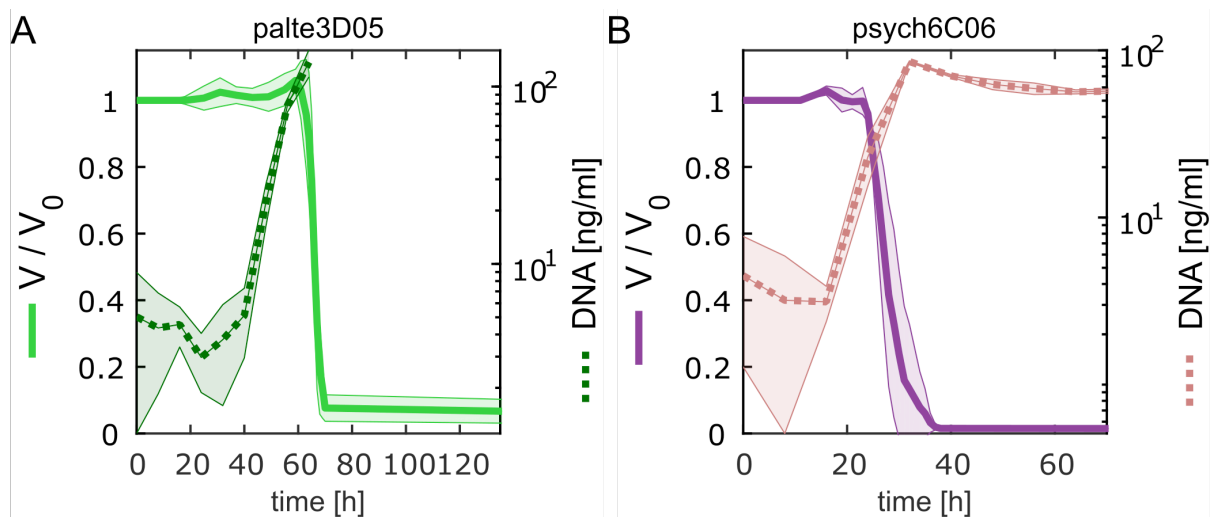

543

544 **Figure S2: Degradation dynamics and bacterial growth for palte3D05 and psych6C06.**

545 Particle volume over time normalized to initial volume (solid line) and bacterial abundance as  
546 measured by the amount of DNA extracted from ~100 particles at different points of  
547 colonization (dashed line). The standard deviation of measurements was calculated using  
548 three replicate particles from the same well, and three different bulk incubations for DNA.

549

550

551

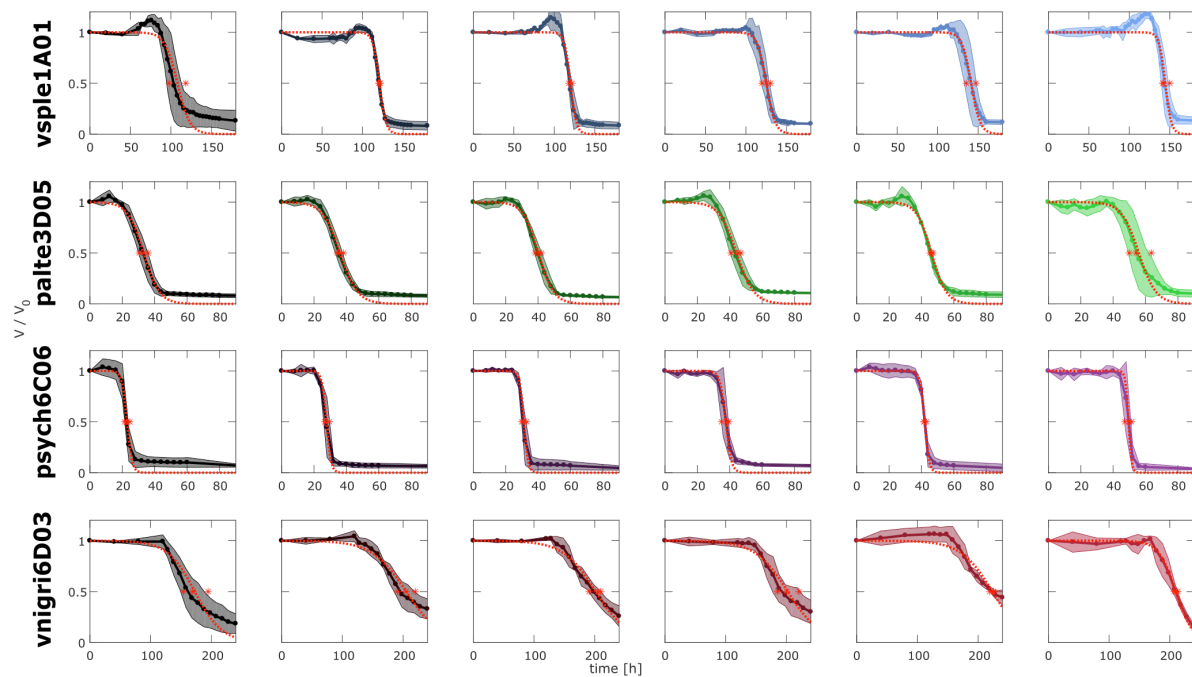

552

553

554

555

556

557

558

559

**Figure S3: Particle volume over time for different initial concentration of primary degraders.** Data corresponds to Fig 2 A-D. Shown are quantified, normalized particle volumes for four primary degraders and six initial cell concentrations (from left to right:  $2^{10}$ ,  $2^8$ ,  $2^6$ ,  $2^4$ ,  $2^2$ ,  $2^0$  cells /  $\mu\text{l}$ ). Solid line: mean, shaded area: standard deviation of  $n=3$  replicate particles. Dashed red line: fit of a sigmoidal function to the mean; red asterisk: inferred  $\tau$  for the three single replicates (see methods).

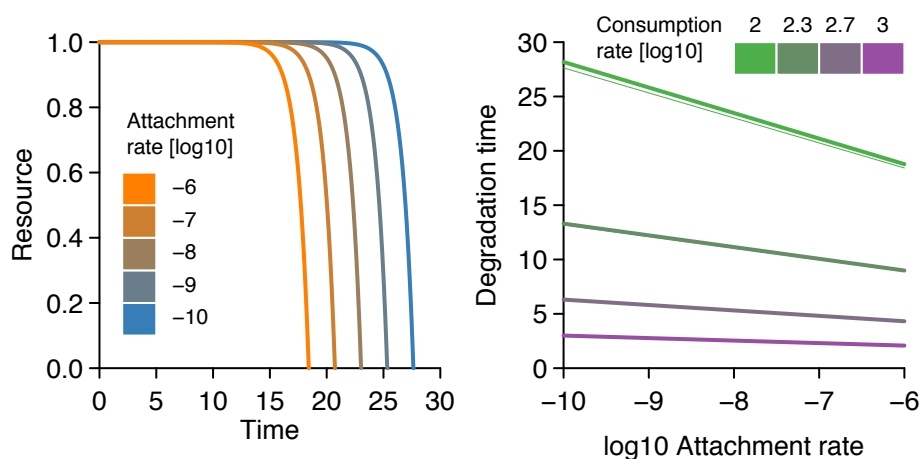

560

561

562

563

564

565

**Figure S4:** Left panel: degradation dynamics predicted by equations 1-6. Attachment rate is the product of the per-cell attachment rate and the number of initial bacterial in the medium. Right panel: particle half-lives as a function of attachment rates for populations with different hydrolytic powers

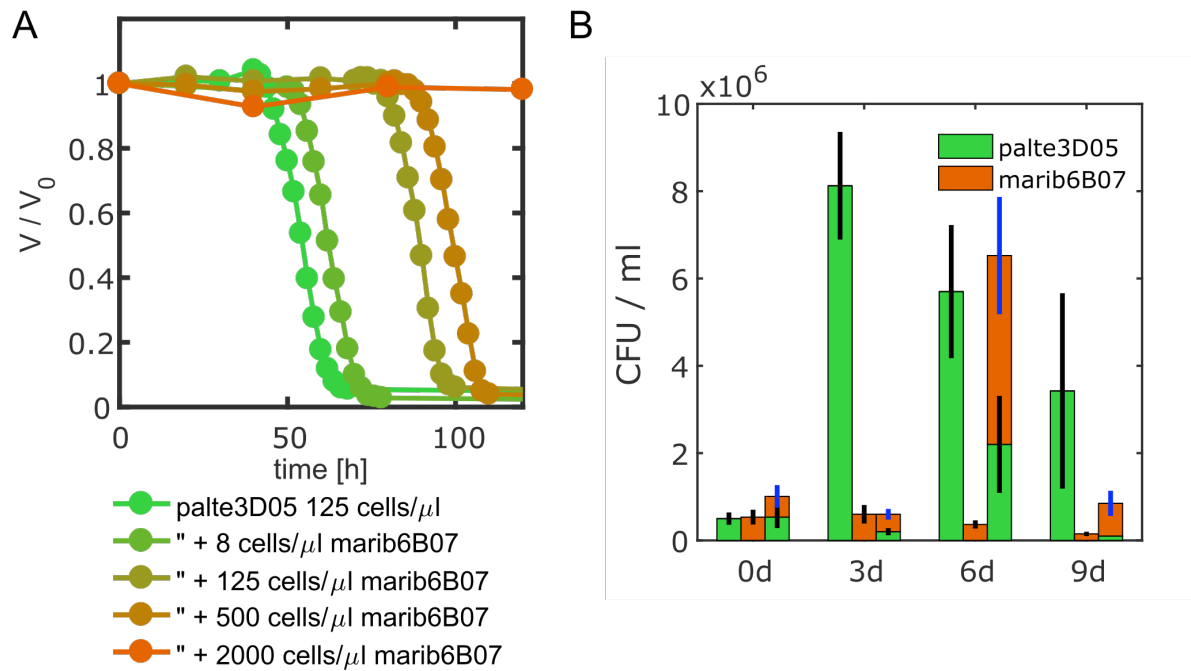

566

567 **Figure S5: Secondary consumer can inhibit degradation of primary degrader palte3D05.**

568 **A)** Particle degradation curves with different marib6b07 concentrations. At increasing  
569 concentrations of the secondary consumer the particle half-life increases disproportionately  
570 beyond the 220 h time limit (endpoint not shown). **B)** CFUs of palte3D05 (500 cells /  $\mu$ l) and  
571 marib6B07 (500 cells /  $\mu$ l) during mono- (first two bars for each time point) and co-culture  
572 (third, stacked bar) on chitin particles, showing that palte3D05 growth in mono-culture peaks  
573 at ~3d and marib6B07 cannot grow in mono-culture. Marib6B07 grows “at the expense” of  
574 palte3D05’s yield and delays peak growth and particle degradation which occurred at ~6d.  
575 Black error bars correspond to palte3D05, blue error bars to marib6B07, respectively (both  
576 depict standard deviation for n=3 replicates). Decrease in CFUs is due to loss of viability after  
577 degradation.

578

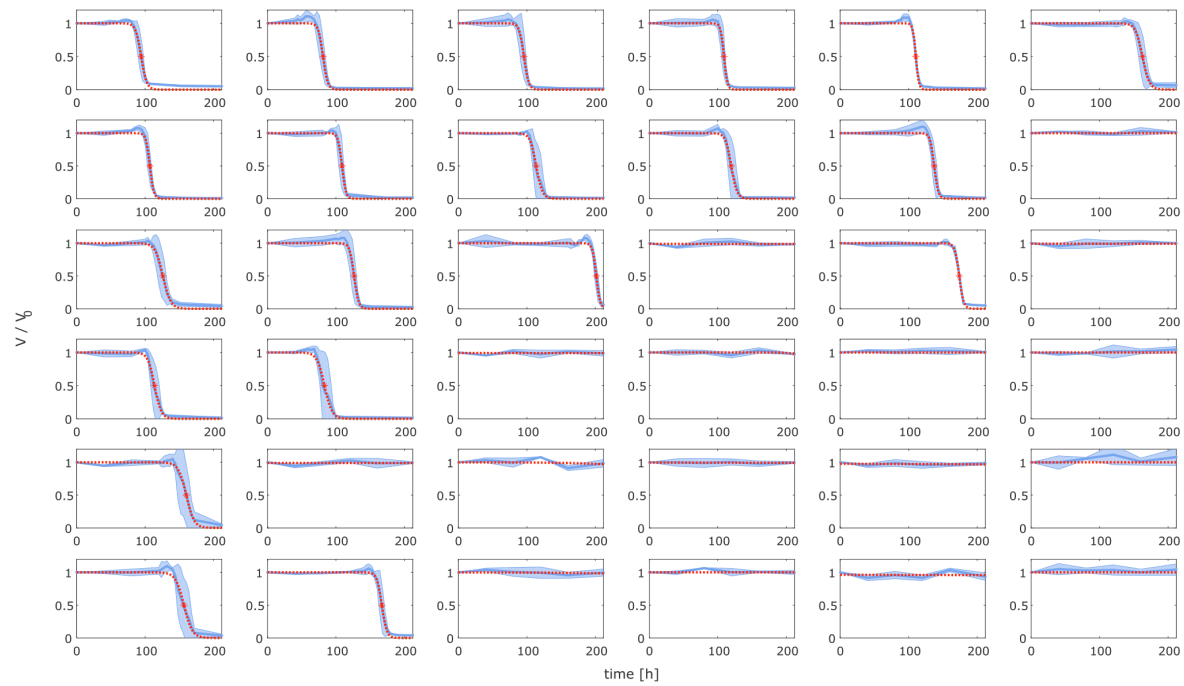

579

580 **Figure S6: Particle volume over time for different initial concentrations of primary**  
581 **degrader vsple1A01 and secondary consumer marib6B07.** Data corresponds to Fig 3C, left  
582 heatmap. Shown are quantified, normalized particle volumes for all fields of the heat map in  
583 the same arrangement. Solid line: mean, shaded area: standard deviation of  $n=3$  replicate  
584 particles. Dashed red line: fit of a sigmoidal function to the mean; red asterisk: inferred  $\tau$   
585 from mean as shown in heat map (see methods).

586

587

588

589



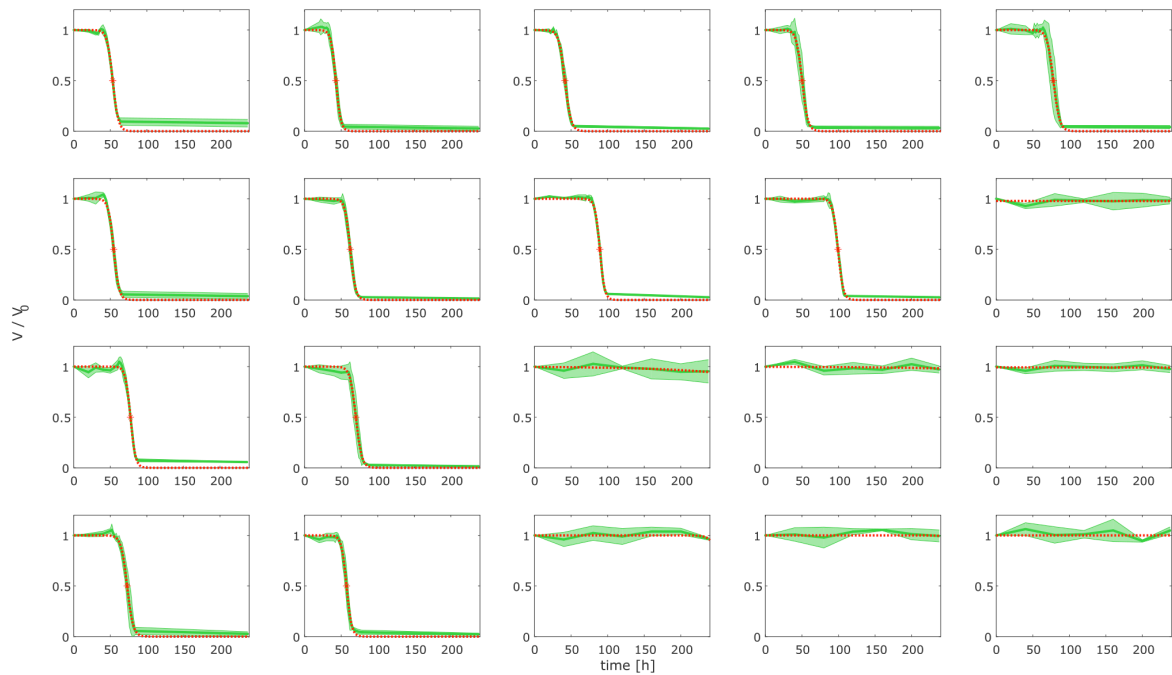

590

591 **Figure S7: Particle volume over time for different initial concentrations of primary**  
 592 **degrader palte3D05 and secondary consumer marib6B07.** Data corresponds to Fig 3C,  
 593 right heatmap. Shown are quantified, normalized particle volumes for all fields of the heat  
 594 map in the same arrangement. Solid line: mean, shaded area: standard deviation of  $n=3$   
 595 replicate particles. Dashed red line: fit of a sigmoidal function to the mean; red asterisk:  
 596 inferred  $\tau$  from mean as shown in heat map (see methods).

597

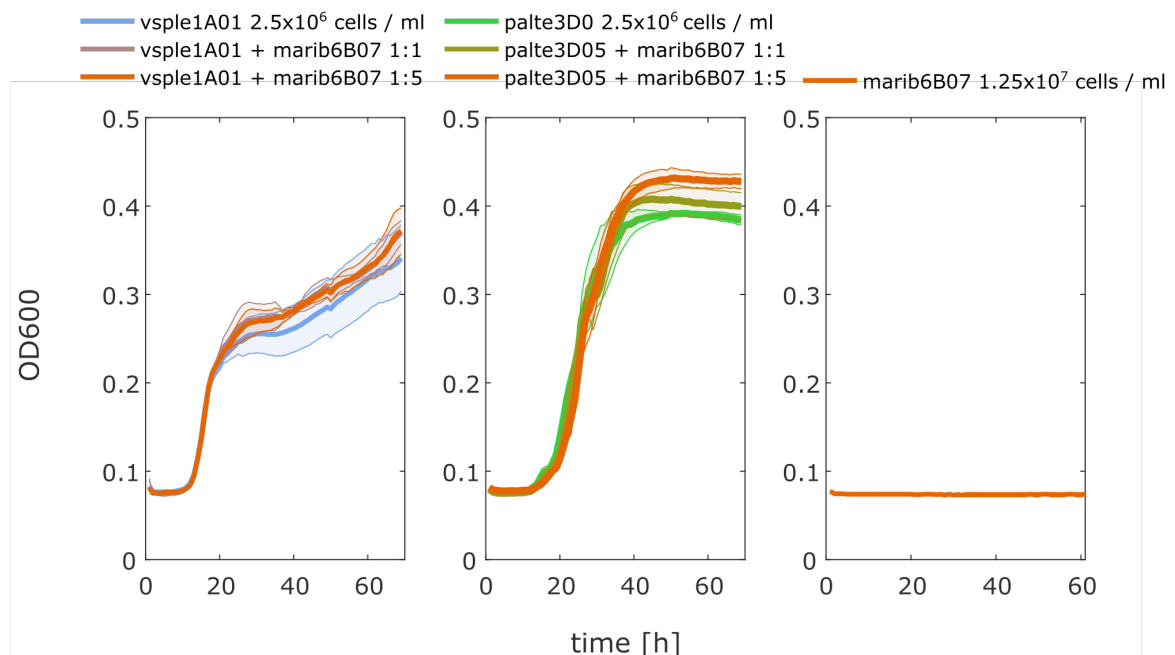

598

599 **Figure S8 Growth of secondary consumer marib6B07 in co-culture with primary**  
 600 **degrader vsple1A01 (left panel), palte3D05 (middle), and in monoculture (right panel)**  
 601 **on 0.1 % GlcNAc (*N*-Acetylglucosamin, chitin monomers). Co-cultures are in 1:1 and 1:5 ratios**  
 602 **of primary degrader to secondary consumer, as indicated above the panels.**

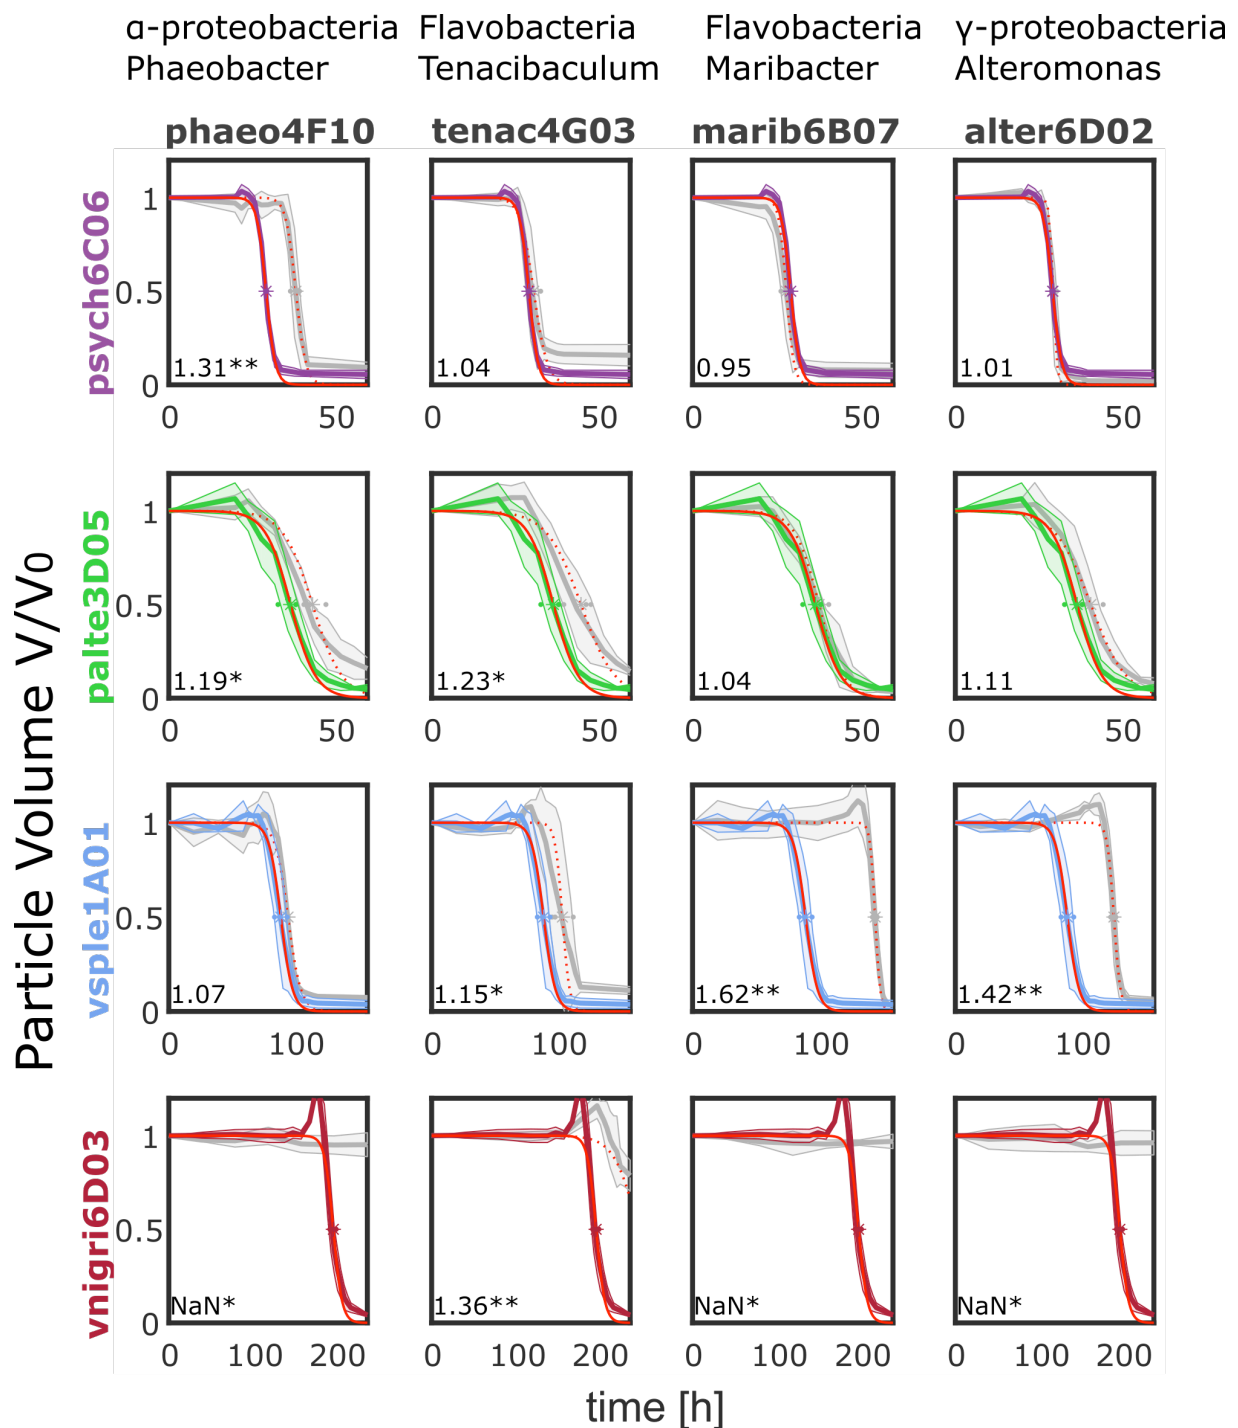

603

604 **Figure S9: Data underlying the network in Fig. 4:** Each panel depicts the normalised  
 605 particle degradation over time for the primary degrader (row) and the secondary degrader  
 606 (column) in the respective colors indicated on the strain name. Solid line: mean, shading:  
 607 standard deviation, n=3. Red solid line: sigmoidal fit to infer  $\tau_{1/2}$  for the respective primary  
 608 degrader, red dashed line sigmoidal fit to infer  $\tau_{1/2}$  for the respective co-culture. Asterisk  
 609 indicates the values of each replicate for  $\tau_{1/2}$ . Text bottom left indicates the ratio of to  
 610  $\frac{\tau_{1/2 \text{ co-culture}}}{\tau_{1/2 \text{ mono-culture}}}$  used to infer the edge thickness of the network in figure 4 and black asterisks  
 611 indicate significance levels, \* < 0.05, \*\* < 0.1. See also Table S3.

612

613

614 **Supplemental Movie 1: 3D reconstruction of a chitin micro particle** colonized by  
615 palte3D05 for 24 h, stained with SYTO9.

616 **Supplemental Movie 2: Phase contrast time-lapse** of a chitin particle cross section taken  
617 during degradation by vsple1A01, corresponding to frames shown in Figure 1C.

618

619 **Supplementary Tables**

620

621 **Table S1: Genomic features of chitin degraders (in red) and non-degraders.** Chitin  
 622 degraders tend to have multiple copies of chitinases, as well as chitin binding proteins,  
 623 GlcNAc chemotaxis and PTS transporter genes. The genomes are deposited at NCBI under  
 624 Bioproject # PRJNA414740 and the respective accession numbers below.

625

| Strain    | # chitinases, Chi | # chitin binding proteins, ChB | # GlcNAc specific chemotaxis genes, GTx | # GlcNAc specific PTS transporter | Accession nr. |
|-----------|-------------------|--------------------------------|-----------------------------------------|-----------------------------------|---------------|
| psych6C06 | 19                | 0                              | 1                                       | 2                                 | PIZM00000000  |
| vsple1A01 | 5                 | 2                              | 7                                       | 2                                 | PDUR00000000  |
| palte3D05 | 7                 | 1                              | 2                                       | 0                                 | PDUS00000000  |
| vnigr6D03 | 10                | 0                              | 5                                       | 2                                 | PIZL00000000  |
| marib6B07 | 2                 | 0                              | 0                                       | 0                                 | PDUT00000000  |
| rhodo4F10 | 6                 | 0                              | 0                                       | 0                                 | PDUV00000000  |
| tenac4G03 | 3                 | 0                              | 0                                       | 0                                 | PDUU00000000  |
| alter6D02 | 1                 | 1                              | 1                                       | 0                                 | PIZK00000000  |

626

627

628 **Table S2: R<sup>2</sup> and p-value of the multiple linear regression from Figure 2E.**

|            | R <sup>2</sup> | p-value  |
|------------|----------------|----------|
| psych6C06  | 0.96           | 5.63E-13 |
| palte3D05  | 0.82           | 1.97E-07 |
| vpsle1A01  | 0.78           | 1.46E-05 |
| vnigri6D03 | 0.40           | 4.88E-03 |

629

630

631
